# Supplementary material for: Live cell imaging of meiosis in Arabidopsis thaliana
Source: eLife. 2019 May 20;8:e42834. doi: 10.7554/eLife.42834 (PMC6559805; doi:10.7554/eLife.42834)
Supplement: Figure 4—source data 1. [file elife-42834-fig4-data1.xlsx]

## Sheet: Sheet1
STATES OF CELL FEATURES
Cell shape	Nucleus Position	Nucleolus Position	Rec8/ Chromatin	Mt Array	Count	Frequency in %	Neighbor. score	Landmark
1	1	1	1	1	844	7.82714	-0.174403	START
1	1	1	2	1	9	0.0834647	-0.548788
1	1	2	2	1	2280	21.1444	3.37785	A1
1	1	2	2	2	162	1.50236	-0.0503141
1	1	2	3	1	32	0.296763	-0.339608
1	1	2	3	2	20	0.185477	-0.34049
1	1	3	2	1	65	0.602801	-0.223164
1	1	3	2	2	34	0.315311	-0.258197
1	1	3	3	1	184	1.70639	-0.0449124
1	1	3	3	2	232	2.15153	1.12512	A2
1	1	3	3	3	1	0.00927386	-0.432388
1	2	2	2	1	6	0.0556431	-0.309504
1	2	2	2	2	3	0.0278216	-0.301875
1	2	3	2	1	7	0.064917	-0.308815
1	2	3	2	2	13	0.12056	-0.415224
1	2	3	2	3	1	0.00927386	-0.349902
1	2	3	3	1	17	0.157656	-0.491141
1	2	3	3	2	48	0.445145	-0.266157
1	2	3	3	3	36	0.333859	-0.518938
1	2	3	3	4	1	0.00927386	-0.540198
2	1	2	2	1	1	0.00927386	-0.313826
2	1	2	2	2	2	0.0185477	-0.307473
2	1	3	2	1	1	0.00927386	-0.309689
2	1	3	2	2	9	0.0834647	-0.428376
2	1	3	3	1	1	0.00927386	-0.562763
2	1	3	3	2	4	0.0370954	-0.449377
2	2	2	2	2	1	0.00927386	-0.395822
2	2	2	3	2	5	0.0463693	-0.424612
2	2	3	2	1	3	0.0278216	-0.339855
2	2	3	2	2	14	0.129834	-0.310766
2	2	3	2	3	14	0.129834	-0.430299
2	2	3	3	1	28	0.259668	-0.255401
STATES OF CELL FEATURES
Cell shape	Nucleus Position	Nucleolus Position	Rec8/ Chromatin	Mt Array	Count	Frequency in %	Neighbor. score	Landmark
2	2	3	3	2	497	4.60911	1.31687	A3
2	2	3	3	3	1069	9.91375	3.24299	A4
2	2	3	3	4	64	0.593527	-0.589579
2	2	3	4	2	17	0.157656	-0.602222
2	2	3	4	3	510	4.72967	0.399146
2	2	3	4	4	327	3.03255	0.117078
3	2	3	3	3	21	0.194751	-0.785087
3	2	3	3	4	51	0.472967	-0.54994
3	2	3	4	3	6	0.0556431	-0.73009
3	2	3	4	4	953	8.83799	3.04585	A5
3	2	3	4	5	20	0.185477	-0.467573
3	2	3	5	4	39	0.36168	-0.355691
3	2	3	5	5	12	0.111286	-0.395371
3	2	4	5	4	10	0.0927386	-0.409407
3	2	4	5	5	5	0.0463693	-0.71537
3	2	4	6	5	1	0.00927386	-0.592981
3	3	3	4	4	48	0.445145	-0.330942
3	3	3	4	5	128	1.18705	0.0313036
3	3	3	5	4	1	0.00927386	-0.491206
3	3	3	5	5	127	1.17778	1.32813	A6
3	3	3	5	6	1	0.00927386	-0.859596
3	3	3	6	5	23	0.213299	-0.443621
3	3	4	4	5	8	0.0741909	-0.915588
3	3	4	5	5	139	1.28907	0.439639
3	3	4	5	6	2	0.0185477	-0.860949
3	3	4	6	5	196	1.81768	0.606075
3	3	4	6	6	26	0.24112	-0.43649
3	4	4	7	7	1	0.00927386	-0.548784
3	4	4	7	8	6	0.0556431	-0.260969
3	4	4	8	9	1	0.00927386	-0.726752
3	4	4	8	10	2	0.0185477	-0.569142
3	4	4	8	11	1	0.00927386	-0.425458
STATES OF CELL FEATURES
Cell shape	Nucleus Position	Nucleolus Position	Rec8/ Chromatin	Mt Array	Count	Frequency in %	Neighbor. score	Landmark
3	5	4	8	10	1	0.00927386	-0.403003
3	5	4	8	11	1	0.00927386	-0.41492
3	6	4	8	13	3	0.0278216	-0.446184
4	3	3	4	4	6	0.0556431	-0.502702
4	3	3	4	5	35	0.324585	-0.362149
4	3	3	5	5	82	0.760456	0.0257596
4	3	3	5	6	1	0.00927386	-0.810993
4	3	3	6	5	6	0.0556431	-0.685428
4	3	3	6	6	9	0.0834647	-0.409046
4	3	3	6	7	1	0.00927386	-0.495506
4	3	4	5	5	68	0.630622	-0.231349
4	3	4	6	5	539	4.99861	2.75911	A7
4	3	4	6	6	115	1.06649	0.215093
4	3	4	6	7	10	0.0927386	-0.301627
4	3	4	7	7	4	0.0370954	-0.573979
4	4	4	6	8	2	0.0185477	-0.509989
4	4	4	7	7	6	0.0556431	-0.331902
4	4	4	7	8	75	0.695539	2.44468	A8
4	4	4	7	9	1	0.00927386	-0.58592
4	4	4	8	9	13	0.12056	-0.145806
4	4	4	8	10	18	0.166929	-0.1164
4	4	4	8	11	5	0.0463693	-0.413512
4	5	4	8	10	8	0.0741909	-0.309237
4	5	4	8	11	203	1.88259	2.81231	A9
4	5	4	8	12	31	0.28749	-0.245689
4	5	4	8	13	3	0.0278216	-0.470319
4	6	4	8	11	4	0.0370954	-0.47199
4	6	4	8	12	3	0.0278216	-0.552114
4	6	4	8	13	158	1.46527	2.39265	A10
4	6	4	8	14	11	0.102012	-0.447481
4	7	4	8	13	7	0.064917	-0.463535
4	7	4	8	14	73	0.676992	-0.349556
Cell shape	Nucleus Position	Nucleolus Position	Rec8/ Chromatin	Mt Array	Count	Frequency in %	Neighbor. score	Landmark
5	6	4	8	13	1	0.00927386	-0.479264
5	7	4	8	14	724	6.71427	2.43893	A11
5	7	4	8	15	46	0.426597	-0.488457
6	7	4	8	14	1	0.00927386	-0.655615
6	7	4	8	15	119	1.10359	-0.306348	END
