# Supplementary material for: Live cell imaging of meiosis in Arabidopsis thaliana
Source: eLife. 2019 May 20;8:e42834. doi: 10.7554/eLife.42834 (PMC6559805; doi:10.7554/eLife.42834)
Supplement: Figure 4—source data 2. [file elife-42834-fig4-data2.xlsx]

## Sheet: Sheet1
Cell Shape	Mt Array	N Position	n Position	Rec8/Chromatin	count	mean	std	min	25%	50%	75%	max
1	1	1	2	2	1000	3.31005	0.0854636	2.95813	3.24657	3.35875	3.38028	3.41465
2	3	2	3	3	1000	3.17831	0.0813716	2.88555	3.12952	3.18313	3.23988	3.35415
3	4	2	3	4	1000	3.02142	0.0600435	2.81232	2.98849	3.03217	3.06585	3.15746
4	5	3	4	6	1000	2.7272	0.0623006	2.54446	2.70855	2.74579	2.7703	2.82744
	11	5	4	8	1000	2.68935	0.136586	2.22931	2.63106	2.64665	2.81006	2.83451
5	14	7	4	8	1000	2.3463	0.121518	2.00939	2.23722	2.43235	2.43868	2.45223
4	8	4	4	7	1000	2.3457	0.118825	1.78641	2.24266	2.41972	2.44381	2.46955
	13	6	4	8	1000	2.34495	0.0952335	2.01946	2.28356	2.36568	2.41629	2.52041
2	2	2	3	3	1000	1.28783	0.0721382	1.08904	1.23637	1.29111	1.33909	1.49686
3	5	3	3	5	1000	1.28684	0.146157	0.859644	1.18652	1.28142	1.37803	1.74565
1	2	1	3	3	1000	1.09794	0.0993793	0.732075	1.03593	1.09858	1.16186	1.41025
3	5	3	4	6	1000	0.588491	0.0790797	0.338593	0.535467	0.588325	0.64567	0.803456
				5	1000	0.410503	0.0794084	0.185086	0.357175	0.406541	0.463605	0.695159
2	3	2	3	4	1000	0.398505	0.0438102	0.276357	0.370557	0.39998	0.426927	0.530525
4	6	3	4	6	1000	0.18704	0.0618698	-0.04932	0.145974	0.186351	0.227815	0.390347
2	4	2	3	4	1000	0.102879	0.0456842	-0.0531434	0.0732285	0.10697	0.135445	0.226866
3	5	3	3	4	1000	0.0143701	0.0415209	-0.109951	-0.0149889	0.0166006	0.0432663	0.135617
4	5	3	3	5	1000	-0.002113	0.0586245	-0.17905	-0.0395838	0.000171581	0.0345887	0.205312
1	1	1	3	3	1000	-0.0555736	0.0232785	-0.125835	-0.0713763	-0.0536072	-0.0396643	0.0272707
	2	1	2	2	1000	-0.0617699	0.0206736	-0.118146	-0.0761468	-0.0616394	-0.0471583	0.00038381
4	10	4	4	8	1000	-0.154087	0.0586306	-0.336334	-0.194536	-0.154594	-0.115312	0.0967609
1	1	1	1	1	1000	-0.174807	0.0159894	-0.222841	-0.186347	-0.174812	-0.16384	-0.115136
4	9	4	4	8	1000	-0.187784	0.118278	-0.55429	-0.266896	-0.186151	-0.109435	0.30566
1	1	1	3	2	1000	-0.233297	0.0166367	-0.294204	-0.24416	-0.233294	-0.22144	-0.181836
4	5	3	4	5	1000	-0.246814	0.0509008	-0.418201	-0.280381	-0.24748	-0.214227	-0.0948917
	12	5	4	8	1000	-0.26092	0.0589983	-0.4498	-0.299672	-0.257658	-0.22056	-0.0494673
1	2	1	3	2	1000	-0.2666	0.0125144	-0.324211	-0.274347	-0.266284	-0.258539	-0.220007
2	1	2	3	3	1000	-0.268516	0.0329337	-0.380753	-0.290824	-0.26906	-0.246237	-0.149977
1	2	2	3	3	1000	-0.274363	0.023045	-0.345155	-0.288837	-0.275099	-0.259736	-0.199616
3	8	4	4	7	1000	-0.296469	0.0759679	-0.508371	-0.349222	-0.301017	-0.247429	-0.00808261
1	2	2	2	2	988	-0.307871	0.00840035	-0.34763	-0.313995	-0.304988	-0.301223	-0.293389
	1	2	3	2	1000	-0.31209	0.00714094	-0.341256	-0.31634	-0.310556	-0.307201	-0.29741
2	1	1	3	2	779	-0.315433	0.00825221	-0.35319	-0.321346	-0.312081	-0.308886	-0.302457
1	1	2	2	2	1000	-0.316461	0.00913087	-0.345402	-0.323369	-0.313195	-0.309303	-0.300798
2	2	1	2	2	952	-0.316732	0.0104996	-0.35439	-0.321855	-0.317739	-0.307568	-0.296445
4	7	3	4	6	1000	-0.319021	0.0653498	-0.497294	-0.36457	-0.321233	-0.27595	-0.0596055
2	2	2	3	2	1000	-0.320237	0.0149078	-0.374632	-0.330538	-0.319367	-0.309232	-0.279547
	1	1	2	2	763	-0.323503	0.0112887	-0.363763	-0.328213	-0.324271	-0.31365	-0.30717
4	10	5	4	8	1000	-0.326483	0.0380225	-0.474621	-0.3492	-0.32812	-0.304053	-0.178626
3	4	3	3	4	1000	-0.336406	0.0246355	-0.413128	-0.351884	-0.336197	-0.320472	-0.266088
6	15	7	4	8	1000	-0.339965	0.0747468	-0.526578	-0.339505	-0.309106	-0.290858	-0.245361
1	2	1	2	3	1000	-0.345305	0.0106714	-0.391219	-0.351669	-0.343444	-0.337794	-0.318036
4	7	4	4	7	1000	-0.345408	0.0750076	-0.567799	-0.397007	-0.347656	-0.296483	-0.0893181
1	1	1	2	3	1000	-0.348945	0.0147774	-0.397869	-0.359603	-0.345938	-0.338016	-0.316039
4	14	7	4	8	1000	-0.350327	0.0225184	-0.420738	-0.365841	-0.350099	-0.3357	-0.277083
2	1	2	3	2	987	-0.354077	0.018302	-0.43457	-0.365567	-0.352452	-0.341934	-0.300283
1	3	2	3	2	777	-0.357358	0.011884	-0.406351	-0.366538	-0.352608	-0.348261	-0.337145
3	4	2	3	5	1000	-0.36305	0.0216944	-0.436513	-0.376496	-0.361018	-0.347982	-0.282973
4	5	3	3	4	1000	-0.391104	0.102036	-0.718582	-0.463466	-0.392229	-0.320241	-0.0813755
2	2	2	2	2	773	-0.399865	0.0121474	-0.450878	-0.406751	-0.398394	-0.391994	-0.366132
3	5	2	3	5	1000	-0.409201	0.0200007	-0.488243	-0.421265	-0.407078	-0.395174	-0.358626
	4	2	4	5	1000	-0.423838	0.0226296	-0.504409	-0.440231	-0.415945	-0.407454	-0.384878
	10	5	4	8	789	-0.424502	0.0282838	-0.541619	-0.440326	-0.420435	-0.403506	-0.360135
1	2	2	3	2	1000	-0.425056	0.0263823	-0.509633	-0.442816	-0.425513	-0.407255	-0.343378
3	11	5	4	8	786	-0.427038	0.0231299	-0.517641	-0.441295	-0.423857	-0.410105	-0.371847
4	6	3	3	6	1000	-0.428017	0.0267866	-0.528153	-0.444113	-0.425874	-0.409366	-0.360491
2	2	2	2	3	1000	-0.431156	0.0125687	-0.483872	-0.439373	-0.428226	-0.421997	-0.401243
4	11	4	4	8	1000	-0.4358	0.0365234	-0.558346	-0.457596	-0.434172	-0.41102	-0.315481
3	11	4	4	8	761	-0.441204	0.0264999	-0.554931	-0.459159	-0.435788	-0.421995	-0.378423
2	3	2	3	2	1000	-0.443018	0.0193876	-0.511012	-0.456831	-0.438588	-0.428494	-0.400816
1	3	1	3	3	786	-0.443054	0.0160425	-0.504988	-0.456163	-0.437337	-0.43046	-0.417213
3	13	6	4	8	992	-0.447308	0.0231444	-0.526942	-0.462137	-0.448563	-0.432761	-0.364555
2	2	1	3	2	1000	-0.449866	0.0277381	-0.557135	-0.468227	-0.449718	-0.431531	-0.37331
4	14	6	4	8	1000	-0.456814	0.0213857	-0.555912	-0.469062	-0.451578	-0.441311	-0.414375
3	6	3	4	6	1000	-0.459646	0.0373377	-0.612626	-0.481949	-0.454274	-0.433862	-0.360201
2	2	1	3	3	1000	-0.461511	0.0156583	-0.519716	-0.471028	-0.459699	-0.450478	-0.42144
3	5	2	3	4	1000	-0.467882	0.0141647	-0.534329	-0.477429	-0.467993	-0.457649	-0.425921
		3	3	6	1000	-0.46809	0.0375037	-0.600502	-0.492893	-0.464697	-0.442439	-0.372604
4	13	7	4	8	1000	-0.472515	0.0201927	-0.557541	-0.481138	-0.467261	-0.458375	-0.433116
5	13	6	4	8	781	-0.479002	0.0092833	-0.532701	-0.482583	-0.478215	-0.473846	-0.458488
4	13	5	4	8	986	-0.483167	0.0341917	-0.593531	-0.504259	-0.480712	-0.459906	-0.386938
	11	6	4	8	997	-0.485997	0.0319686	-0.584974	-0.504216	-0.480168	-0.463785	-0.411777
3	4	3	3	5	802	-0.490358	0.00898264	-0.514895	-0.496416	-0.490467	-0.48473	-0.460036
1	1	2	3	3	1000	-0.499486	0.0288921	-0.61616	-0.518785	-0.497812	-0.480131	-0.409819
4	7	3	3	6	775	-0.504078	0.0318992	-0.596812	-0.521616	-0.499596	-0.481903	-0.422758
	4	3	3	4	999	-0.512636	0.0217564	-0.581301	-0.516012	-0.505252	-0.498708	-0.472927
5	15	7	4	8	1000	-0.516407	0.0499249	-0.647839	-0.523501	-0.496831	-0.483954	-0.434582
4	8	4	4	6	960	-0.525349	0.0506989	-0.710976	-0.556055	-0.523538	-0.492191	-0.346775
3	7	4	4	7	798	-0.545327	0.0335857	-0.655263	-0.567423	-0.545947	-0.522791	-0.440352
1	3	2	3	3	1000	-0.546649	0.0348349	-0.691659	-0.567131	-0.542281	-0.520326	-0.468509
3	4	2	3	3	1000	-0.550151	0.0127465	-0.586049	-0.558296	-0.550414	-0.542461	-0.494378
1	1	1	1	2	1000	-0.56188	0.024176	-0.619194	-0.559041	-0.550345	-0.546557	-0.532781
4	12	6	4	8	990	-0.562609	0.0267516	-0.651	-0.57856	-0.560332	-0.544206	-0.491351
1	4	2	3	3	790	-0.563625	0.0331301	-0.685167	-0.589304	-0.547045	-0.538692	-0.520821
2	1	1	3	3	786	-0.57581	0.0226841	-0.687543	-0.588979	-0.571501	-0.559566	-0.530393
3	5	2	4	6	796	-0.592023	0.0124267	-0.650099	-0.599982	-0.592187	-0.583407	-0.544189
4	9	4	4	7	786	-0.599065	0.050126	-0.797787	-0.628823	-0.594141	-0.56417	-0.475472
2	2	2	3	4	1000	-0.601443	0.0100778	-0.632044	-0.608441	-0.601396	-0.594364	-0.568419
	4	2	3	3	1000	-0.603648	0.0307713	-0.693402	-0.614267	-0.595224	-0.582627	-0.543416
4	7	3	4	7	998	-0.607195	0.0572447	-0.810584	-0.639416	-0.60014	-0.56682	-0.463536
3	10	4	4	8	946	-0.628034	0.181871	-1.28423	-0.746846	-0.633159	-0.523816	0.591377
6	14	7	4	8	771	-0.657283	0.0112888	-0.693045	-0.664217	-0.657108	-0.649218	-0.624515
4	5	3	3	6	999	-0.698812	0.032097	-0.800491	-0.716526	-0.693001	-0.676965	-0.624002
3	5	2	4	5	998	-0.728065	0.0409628	-0.883839	-0.752117	-0.722086	-0.70004	-0.628576
	3	2	3	4	1000	-0.729737	0.00816384	-0.756162	-0.735398	-0.72987	-0.724226	-0.70445
	9	4	4	8	763	-0.747873	0.123213	-1.16248	-0.826082	-0.748742	-0.674128	-0.197016
	3	2	3	3	1000	-0.784357	0.0100955	-0.818338	-0.791058	-0.784395	-0.777575	-0.754045
4	6	3	3	5	776	-0.840742	0.0521135	-1.05992	-0.870529	-0.832617	-0.80141	-0.716142
3	6	3	3	5	771	-0.874851	0.0452583	-1.06774	-0.899516	-0.86355	-0.843372	-0.794913
			4	5	944	-0.89444	0.0539902	-1.08974	-0.931059	-0.8813	-0.853149	-0.785852
	5	3	4	4	1000	-0.918141	0.0522275	-1.13701	-0.948685	-0.917037	-0.885431	-0.783972
