# Supplementary material for: Live cell imaging of meiosis in Arabidopsis thaliana
Source: eLife. 2019 May 20;8:e42834. doi: 10.7554/eLife.42834 (PMC6559805; doi:10.7554/eLife.42834)
Supplement: Figure 4—source data 4. [file elife-42834-fig4-data4.xlsx]

## Sheet: Sheet1
Cell Shape	Mt Array	N Position	n Position	Rec8/Chromatin	count	mean	std	min	25%	50%	75%	max
3	6	2	4	6	1000	3.28496	0.0937013	2.91791	3.22053	3.29082	3.3597	3.48293
	4	2	3	4	1000	2.75871	0.075419	2.4418	2.70883	2.7665	2.81342	2.96071
4	5	3	3	5	1000	2.31533	0.126095	1.9066	2.23566	2.31842	2.40277	2.68311
	9	4	4	7	1000	2.10644	0.170923	1.50748	2.0138	2.11556	2.24598	2.40153
	5	3	4	6	1000	2.06606	0.124066	1.68553	1.98061	2.06979	2.15198	2.41389
1	1	1	2	2	1000	2.02979	0.148057	1.48729	1.93619	2.04084	2.13575	2.41782
3	12	5	4	8	1000	1.89304	0.120386	1.52736	1.81073	1.91116	1.98747	2.15741
	4	2	3	5	1000	1.52111	0.101053	1.19829	1.4587	1.52239	1.59377	1.78636
2	3	2	3	3	1000	1.34776	0.109591	1.00477	1.27754	1.34955	1.41954	1.71192
3	5	3	3	5	1000	1.34319	0.111261	1.03491	1.26641	1.34119	1.41864	1.69225
6	14	5	4	8	1000	1.25872	0.0273588	1.16427	1.24188	1.25982	1.27875	1.34155
1	2	1	3	3	1000	1.03548	0.373489	-0.19809	0.779608	1.02722	1.28323	2.16437
5	13	5	4	8	1000	0.781101	0.0582904	0.491681	0.741587	0.782231	0.819101	0.957357
2	4	2	3	3	1000	0.693186	0.064939	0.518114	0.647218	0.692267	0.734739	0.889889
3	9	4	4	7	1000	0.679766	0.219058	0.0249657	0.527662	0.674176	0.814416	1.41488
4	7	3	3	6	1000	0.577055	0.175745	0.0267014	0.460389	0.568003	0.700167	1.17804
	12	5	4	8	1000	0.550293	0.0889544	0.249251	0.487769	0.552922	0.615191	0.845542
	6	3	4	6	1000	0.358195	0.100276	0.0905151	0.293289	0.353982	0.426905	0.674883
3	6	3	4	6	1000	0.330903	0.0999398	0.037797	0.26443	0.329802	0.396401	0.656147
4	6	3	3	5	1000	0.2991	0.0974742	0.0176772	0.230512	0.299013	0.366011	0.609216
1	1	1	1	1	1000	0.236813	0.243785	-0.707107	0.187193	0.273709	0.364534	0.707107
4	7	3	4	6	1000	0.119301	0.149303	-0.32629	0.0157662	0.113513	0.220035	0.552423
2	4	2	3	4	1000	0.0756955	0.0588698	-0.100844	0.0363439	0.0765438	0.116463	0.277919
3	5	3	4	6	1000	0.0354291	0.0972166	-0.27169	-0.0265738	0.0351895	0.10097	0.332353
	10	4	4	8	1000	0.00976689	0.257612	-0.698596	-0.174899	0	0.165479	0.914993
1	1	1	3	3	1000	0.000789088	0.121034	-0.356974	-0.086261	-0.00353019	0.0825142	0.471588
	3	1	3	3	1000	-0.131962	0.0630663	-0.30566	-0.178138	-0.130729	-0.0869995	0.0560569
3	5	2	3	5	1000	-0.157783	0.0442685	-0.285695	-0.18745	-0.158013	-0.128954	-0.0171976
	9	4	4	5	957	-0.159739	0.671328	-1.39076	-0.676252	-0.261116	0.261116	1.5
	6	2	4	5	1000	-0.188652	0.073264	-0.376468	-0.242518	-0.189534	-0.139161	0.0496792
			3	5	1000	-0.204526	0.0797078	-0.468518	-0.25639	-0.205611	-0.153134	0.0883158
		3	3	5	1000	-0.20831	0.0759692	-0.432285	-0.264149	-0.210171	-0.154603	0.0438937
4	8	3	4	6	1000	-0.215998	0.148204	-0.616465	-0.3146	-0.226889	-0.121214	0.447608
3	5	3	4	5	1000	-0.241939	0.0735845	-0.459503	-0.295564	-0.244075	-0.191313	0.047299
1	2	1	2	2	1000	-0.24756	0.0847948	-0.475191	-0.308928	-0.251187	-0.1975	0.102911
6	13	5	4	8	1000	-0.258644	0.0365512	-0.562825	-0.281255	-0.258493	-0.235226	-0.144479
3	5	3	3	6	1000	-0.357589	0.0651798	-0.550741	-0.401958	-0.358775	-0.310645	-0.0618651
	11	4	4	8	786	-0.387847	0.0233932	-0.492495	-0.401453	-0.384963	-0.370167	-0.339453
4	11	5	4	8	1000	-0.392515	0.0385174	-0.554096	-0.41528	-0.392021	-0.365218	-0.284239
3	4	2	3	3	1000	-0.392583	0.0540559	-0.565337	-0.420976	-0.381739	-0.355561	-0.251833
	6	3	3	6	1000	-0.395556	0.0688715	-0.574827	-0.444193	-0.396242	-0.348585	-0.175762
	7	3	4	6	1000	-0.396942	0.0450178	-0.547197	-0.42591	-0.397524	-0.367589	-0.241834
4	11	4	4	8	765	-0.401663	0.0255273	-0.544045	-0.415897	-0.399646	-0.384242	-0.323708
1	3	2	3	3	1000	-0.411965	0.0402576	-0.534414	-0.438891	-0.411731	-0.382502	-0.286863
4	5	3	4	5	1000	-0.412743	0.0621298	-0.61817	-0.452647	-0.410972	-0.37107	-0.246435
	10	4	4	8	787	-0.440039	0.0555202	-0.612877	-0.476538	-0.439405	-0.406526	-0.210732
3	8	3	4	6	993	-0.440577	0.215727	-1.10965	-0.577945	-0.449533	-0.321218	0.463586
	6	2	3	6	1000	-0.44991	0.0550362	-0.639172	-0.486164	-0.450786	-0.416126	-0.227441
	11	5	4	8	1000	-0.450951	0.0457822	-0.62384	-0.477751	-0.446214	-0.41964	-0.321062
	7	2	4	6	1000	-0.452843	0.0327736	-0.583921	-0.475965	-0.453589	-0.432073	-0.349293
	8	3	4	5	948	-0.46185	0.343436	-1.43737	-0.695304	-0.506683	-0.277032	1.01905
	5	3	3	4	1000	-0.462023	0.0286686	-0.58662	-0.479638	-0.460781	-0.44289	-0.366901
1	2	2	3	3	992	-0.467739	0.0337955	-0.568076	-0.487983	-0.465795	-0.444323	-0.383731
	1	1	2	3	1000	-0.470317	0.0686896	-0.65365	-0.51766	-0.47313	-0.423304	-0.28513
3	9	4	4	6	996	-0.477243	0.0818042	-0.852013	-0.530151	-0.478128	-0.42662	-0.160437
2	2	2	3	3	765	-0.485389	0.0200243	-0.555893	-0.498863	-0.484367	-0.470587	-0.428453
3	8	4	4	7	989	-0.486783	0.0813817	-0.770842	-0.544514	-0.491374	-0.434599	-0.179031
4	9	4	4	8	990	-0.497024	0.0807884	-0.806074	-0.551185	-0.496365	-0.445855	-0.223915
2	3	2	2	3	1000	-0.500825	0.0310882	-0.590891	-0.521241	-0.499194	-0.47953	-0.390428
4	4	3	3	4	957	-0.522507	0.0197623	-0.586764	-0.528056	-0.515361	-0.509649	-0.485387
	6	2	4	6	1000	-0.52522	0.0399711	-0.661542	-0.550455	-0.526536	-0.498169	-0.408277
3	5	2	4	5	1000	-0.528791	0.0391086	-0.694726	-0.554155	-0.528551	-0.50092	-0.42029
				6	1000	-0.552154	0.0510082	-0.734458	-0.585851	-0.550703	-0.518015	-0.371894
1	1	1	3	2	999	-0.554498	0.0617607	-0.719801	-0.597457	-0.556174	-0.513998	-0.34336
2	3	2	3	4	1000	-0.557129	0.0246838	-0.636722	-0.571979	-0.5528	-0.539611	-0.493141
		1	3	3	1000	-0.557867	0.0320235	-0.663803	-0.577962	-0.555177	-0.535458	-0.480982
4	12	4	4	8	761	-0.557983	0.0287071	-0.696459	-0.576503	-0.548919	-0.53709	-0.505912
1	2	1	3	2	984	-0.561134	0.0672391	-0.80197	-0.60533	-0.563128	-0.515076	-0.271183
3	4	2	4	5	1000	-0.563288	0.012831	-0.608447	-0.571561	-0.563507	-0.554968	-0.507264
		3	3	5	1000	-0.576451	0.0253801	-0.681043	-0.592109	-0.57395	-0.558172	-0.511452
	9	4	4	8	771	-0.579556	0.0564982	-0.770974	-0.614144	-0.577058	-0.542051	-0.420308
4	7	3	3	5	1000	-0.582327	0.0991285	-0.896102	-0.64899	-0.583213	-0.516434	-0.278286
	8	4	4	7	760	-0.590792	0.0593599	-0.816409	-0.628313	-0.590055	-0.550788	-0.40235
	5	3	3	4	1000	-0.591876	0.0394449	-0.748188	-0.614538	-0.586543	-0.56466	-0.487455
	4	3	3	5	998	-0.602688	0.0313571	-0.734849	-0.621567	-0.596196	-0.58033	-0.536435
	12	5	3	8	1000	-0.602991	0.0350155	-0.701358	-0.622416	-0.593342	-0.578831	-0.529467
2	4	2	2	4	996	-0.604409	0.0115505	-0.643265	-0.612203	-0.604173	-0.596629	-0.571858
4	10	5	4	8	954	-0.606269	0.239599	-1.24589	-0.760507	-0.638545	-0.470998	0.323557
2	4	2	3	5	1000	-0.611232	0.013551	-0.682187	-0.620534	-0.611855	-0.602397	-0.555788
3	5	2	3	4	1000	-0.616763	0.0331847	-0.743003	-0.638706	-0.611716	-0.591631	-0.53737
4	5	2	3	5	780	-0.623991	0.0241382	-0.713474	-0.637982	-0.621415	-0.606254	-0.568291
1	2	1	2	3	764	-0.62661	0.0511585	-0.800671	-0.6588	-0.62407	-0.593308	-0.490257
3	8	4	4	6	755	-0.642676	0.126615	-1.06862	-0.720662	-0.650366	-0.568733	-0.138926
	4	3	3	4	766	-0.654565	0.0131527	-0.717188	-0.660918	-0.653544	-0.645929	-0.618191
4	5	3	3	6	1000	-0.654836	0.052956	-0.830799	-0.687534	-0.653106	-0.619386	-0.50069
	6	2	4	5	778	-0.659407	0.0370037	-0.795683	-0.682778	-0.655185	-0.632309	-0.562332
		3	3	6	1000	-0.660079	0.0335436	-0.763387	-0.682502	-0.66111	-0.637125	-0.549121
	13	5	4	8	1000	-0.661876	0.0425521	-0.778953	-0.684438	-0.651025	-0.631554	-0.564431
	5	2	4	6	776	-0.674783	0.0341609	-0.80517	-0.696632	-0.671076	-0.648551	-0.601488
5	12	5	4	8	997	-0.677333	0.0323235	-0.773213	-0.692254	-0.667395	-0.654532	-0.605229
1	3	1	2	2	767	-0.679394	0.105918	-1.11172	-0.742256	-0.673596	-0.610234	-0.329254
3	5	2	3	6	785	-0.684511	0.0274005	-0.786324	-0.701659	-0.682005	-0.664441	-0.618489
	10	5	4	8	793	-0.724441	0.171855	-1.47442	-0.832704	-0.733312	-0.621766	0.219687
	7	3	4	5	779	-0.724723	0.0478493	-0.87069	-0.756599	-0.724562	-0.693003	-0.562522
4	6	3	4	5	991	-0.732646	0.0332718	-0.854686	-0.754812	-0.730933	-0.70936	-0.626902
3	7	3	3	6	1000	-0.746375	0.0878379	-0.979957	-0.811929	-0.747511	-0.691163	-0.464244
4	7	3	4	7	785	-0.786247	0.065806	-1.10188	-0.822358	-0.775783	-0.741537	-0.624497
1	1	1	1	2	951	-0.787968	0.0370375	-0.930071	-0.812405	-0.787088	-0.763168	-0.627558
5	14	5	4	8	1000	-0.795079	0.0191736	-0.864257	-0.807862	-0.795191	-0.782334	-0.736641
2	4	2	2	3	999	-0.95483	0.0235988	-1.10945	-0.968559	-0.953981	-0.940071	-0.856651
3	8	2	4	6	771	-0.981036	0.248687	-1.7385	-1.12101	-0.984374	-0.836739	0.253185
	6	4	4	6	755	-1.21496	0.0483212	-1.3803	-1.24763	-1.21203	-1.18113	-1.06743
