# Supplementary material for: Live cell imaging of meiosis in Arabidopsis thaliana
Source: eLife. 2019 May 20;8:e42834. doi: 10.7554/eLife.42834 (PMC6559805; doi:10.7554/eLife.42834)
Supplement: Figure 5—source data 1. [file elife-42834-fig5-data1.xlsx]

## Sheet: Sheet1
STATES OF CELL PARAMETERS RELEAVED BY PRORPSA5:TagRFP:TUB4
Cell shape	Mt Array	Nucleus Position	Counts	Frequency in %	Neighbor. score	Landmark
1	1	1	3955	33.5995	2.25095	START/A1
1	2	1	508	4.31569	-0.0543425
1	3	1	1	0.00849545	-0.528217
1	1	2	32	0.271855	-0.49394
1	2	2	72	0.611673	-0.494501
1	3	2	40	0.339818	-0.649362
1	4	2	1	0.00849545	-0.584879
2	1	1	3	0.0254864	-0.506968
2	2	1	16	0.135927	-0.568797
2	1	2	48	0.407782	-0.426423
2	2	2	574	4.87639	0.501466
2	3	2	1715	14.5697	2.24762	A4
2	4	2	403	3.42367	-0.0318435
3	3	2	27	0.229377	-0.941724
3	4	2	1107	9.40447	0.969664
3	5	2	46	0.390791	-0.922345
3	4	3	49	0.416277	-0.790947
3	5	3	640	5.43709	0.67994
3	6	3	32	0.271855	-0.616651
3	7	4	4	0.0339818	-0.696936
3	8	4	15	0.127432	-0.143523
3	9	4	1	0.00849545	-0.590637
3	10	4	2	0.0169909	-0.585533
3	11	4	1	0.00849545	-0.428801
3	10	5	1	0.00849545	-0.403926
3	11	5	1	0.00849545	-0.415305
3	13	6	3	0.0254864	-0.446184
4	4	3	6	0.0509727	-1.06826
4	5	3	777	6.60097	1.65439	A7
4	6	3	126	1.07043	-0.403446
4	7	3	17	0.144423	-0.580626
4	7	4	6	0.0509727	-0.629365
4	8	4	98	0.832555	2.42866	A8
4	9	4	14	0.118936	-0.18194
4	10	4	19	0.161414	-0.145638
4	11	4	6	0.0509727	-0.402297
4	8	5	2	0.0169909	-0.624026
4	10	5	8	0.0679636	-0.31514
4	11	5	207	1.75856	2.81296	A9
4	12	5	31	0.263359	-0.250315
4	13	5	3	0.0254864	-0.470319
4	11	6	4	0.0339818	-0.470801
4	12	6	3	0.0254864	-0.550634
4	13	6	158	1.34228	2.39265	A10
4	14	6	11	0.09345	-0.447013
4	13	7	7	0.0594682	-0.462978
4	14	7	73	0.620168	-0.349941
5	13	6	1	0.00849545	-0.478758
5	14	7	728	6.18469	2.43787	A11
5	15	7	46	0.390791	-0.490525
6	14	7	1	0.00849545	-0.657535
6	15	7	122	1.03645	-0.301156
STATES OF CELL PARAMETERS REVEALED by PROREC8:REC8:GFP
Nucleolus Position	Rec8/ Chromatin	Count	Frequency in %	Neighbor. score	Landmark
1	1	844	7.55122	-0.208218	START
1	2	9	0.0805225	-0.72874
2	2	2456	21.9737	1.30944	A1
2	3	57	0.509976	-0.923534
3	2	161	1.44046	-0.825053
3	3	2306	20.6317	0.923251
3	4	2101	18.7975	1.18774	A5
3	5	264	2.36199	-0.421227
3	6	39	0.348931	-0.733163
4	4	8	0.0715756	-0.867051
4	5	227	2.03096	-0.466512
4	6	1010	9.03641	1.73872	A7
4	7	95	0.84996	-0.783197
4	8	1600	14.3151	0.707107
