# Supplementary material for: Live cell imaging of meiosis in Arabidopsis thaliana
Source: eLife. 2019 May 20;8:e42834. doi: 10.7554/eLife.42834 (PMC6559805; doi:10.7554/eLife.42834)
Supplement: Figure 7—source data 1. [file elife-42834-fig7-data1.xlsx]

## Sheet: Sheet1
NUMBER OF SAMPLES PER LANDMARK EXTRACTION
	WT	tam
flower	21	16
anther	35	18
cell	169	62
NUMBER OF SAMPLES PER TIME COURSE
	WT	tam
		Population A	Population B
flower	11	9	7
anther	17	15	10
cell	136	53	23
NUMBER OF COMPLETE OBSERVATIONS AND AVERAGE DURATION OF EACH LANDMARK IN WT PLANTS
Landmark	Counts	Average duration (min)	St.Dev
START	0	//	//
A1	17	506.765	97.0493
A2	34	96.1765	54.9388
A3	43	181.163	91.4749
A4	44	189.864	83.2211
A5	17	396.421	190.131
A6	37	193.514	74.674
A7	26	201.885	108.913
A8	30	57.3333	29.0877
A9	28	56	11.7631
A10	45	42.0444	9.74436
A11	4	181.25	62.5
END	0	//	//
NUMBER OF COMPLETE OBSERVATIONS AND AVERAGE DURATION OF EACH LANDMARK IN tam PLANTS
	Population A			Population B
Landmark	Counts	Average duration (min)	St.Dev	Counts	Average duration (min)	St.Dev
START	0	//	//	0	//	//
t1	3	334	172.64	3	380.333	147.219
t2	5	140	31.6228	3	193.333	98.4322
t3	9	155.556	57.5637	5	188	97.0361
t4	15	388.533	101.122	11	362.909	126.943
t5	23	161.217	100.432	14	152.143	118.151
t6	24	105.542	106.483	19	225	152.419
t7	20	424	152.669	0	//	//
t8	0	//	//	11	222.727	84.3252
t9	10	44	36.3868	16	217.938	159.201
t10	28	84.6429	29.4573	10	85	18.0278
t11	14	155	36.5963	2	145	5
t12/END	0	//	//	0	//	//
