# Supplementary material for: Live cell imaging of meiosis in Arabidopsis thaliana
Source: eLife. 2019 May 20;8:e42834. doi: 10.7554/eLife.42834 (PMC6559805; doi:10.7554/eLife.42834)
Supplement: Figure 7—source data 2. [file elife-42834-fig7-data2.xlsx]

## Sheet: 2x_SC_180701.csv
Figure 7-source data 2: Landmark duration in WT
sample	START	A1	A2	A3	A4	A5	A6	A7	A8	A9	A10	A11	A12
FLOWER01_2X_SC-cell2									40	45
FLOWER01_2X_SC-cell5									45	45
FLOWER01_2X_SC-cell6									45
FLOWER02_2X_SC-cell1										45	40	120
FLOWER02_2X_SC-cell3											40	135
FLOWER03_2x_L_SC-cell10							160	230	50	70	30
FLOWER03_2x_L_SC-cell11					110
FLOWER03_2x_L_SC-cell12					30	330					30
FLOWER03_2x_L_SC-cell14					110
FLOWER03_2x_L_SC-cell15					200	150	100			60	40
FLOWER03_2x_L_SC-cell2					160
FLOWER03_2x_L_SC-cell3					110
FLOWER03_2x_L_SC-cell4										60	40
FLOWER03_2x_L_SC-cell5					110
FLOWER03_2x_L_SC-cell6					110
FLOWER03_2x_L_SC-cell7							110	190	40
FLOWER03_2x_L_SC-cell8							120	190	40	70	30
FLOWER03_2x_L_SC-cell9							130	170
FLOWER03_2x_R_SC-cell1							70				30
FLOWER03_2x_R_SC-cell10										50	50
FLOWER03_2x_R_SC-cell2							80	270	40	50	30
FLOWER03_2x_R_SC-cell3							240				40
FLOWER03_2x_R_SC-cell4							200	240			30
FLOWER03_2x_R_SC-cell5							190	260
FLOWER03_2x_R_SC-cell6							210				30
FLOWER03_2x_R_SC-cell7				100	90
FLOWER03_2x_R_SC-cell8							230			60	40
FLOWER03_2x_R_SC-cell9											40
FLOWER12_2X_R_SC-cell14		725			220
FLOWER12_2X_R_SC-cell15					180
FLOWER12_2X_R_SC-cell16					200
FLOWER12_2X_R_SC-cell19					170
FLOWER12_2X_R_SC-cell20					210
FLOWER12_2X_R_SC-cell3					280
FLOWER12_2X_R_SC-cell7		675
FLOWER13b_2X_U_SC-cell1					107
FLOWER13b_2X_U_SC-cell10					107
FLOWER13b_2X_U_SC-cell11					167
FLOWER13b_2X_U_SC-cell2					137
FLOWER13b_2X_U_SC-cell4					157
FLOWER13b_2X_U_SC-cell5				40	117
FLOWER13b_2X_U_SC-cell8					167
FLOWER14_2X_L_SC-cell1				190	120
FLOWER14_2X_L_SC-cell10				300	210
FLOWER14_2X_L_SC-cell11				130	280
FLOWER14_2X_L_SC-cell12			130	50	240
FLOWER14_2X_L_SC-cell2				170	380
FLOWER14_2X_L_SC-cell3				330
FLOWER14_2X_L_SC-cell4			80	180	340
FLOWER14_2X_L_SC-cell5			190	300
FLOWER14_2X_L_SC-cell6			70	230
FLOWER14_2X_L_SC-cell7			70	450
FLOWER14_2X_L_SC-cell8			100	370
FLOWER14_2X_L_SC-cell9			160	340
FLOWER14_2X_U_SC-cell11			50	130	391
FLOWER14_2X_U_SC-cell15				170
FLOWER14_2X_U_SC-cell17			60	170	281
FLOWER14_2X_U_SC-cell18			30	160	291
FLOWER14_2X_U_SC-cell3			80	110
FLOWER14_2X_U_SC-cell4		575	90	70	371
FLOWER14_2X_U_SC-cell6			70	140	291
FLOWER17_2X_L_SC-cell1			110	260
FLOWER17_2X_L_SC-cell14			70	300
FLOWER17_2X_L_SC-cell16			70	300
FLOWER17_2X_L_SC-cell2				210	210
FLOWER17_2X_R_SC-cell11			270
FLOWER17_2X_R_SC-cell12				180
FLOWER17_2X_R_SC-cell13			50
FLOWER17_2X_R_SC-cell17							165
FLOWER17_2X_R_SC-cell18							255
FLOWER17_2X_R_SC-cell2			130	120
FLOWER17_2X_R_SC-cell3			210	200			105
FLOWER17_2X_R_SC-cell6				120			135
FLOWER22_2X_R_SC-cell1							120
FLOWER22_2X_R_SC-cell10									100
FLOWER22_2X_R_SC-cell12							260
FLOWER22_2X_R_SC-cell13								550.5	100
FLOWER22_2X_R_SC-cell15									100
FLOWER22_2X_R_SC-cell2									100
FLOWER22_2X_R_SC-cell3									100
FLOWER22_2X_R_SC-cell5							180	510.5	100
FLOWER22_2X_R_SC-cell6									100
FLOWER22_2X_R_SC-cell7									100
FLOWER22_2X_R_SC-cell9									100
FLOWER22_2x_L_SC-cell1						778
FLOWER22_2x_L_SC-cell10							250
FLOWER22_2x_L_SC-cell11							140
FLOWER22_2x_L_SC-cell2						798
FLOWER22_2x_L_SC-cell3							260
FLOWER22_2x_L_SC-cell7						818
FLOWER22_2x_L_SC-cell9							110
FLOWER24_2X_R_SC-cell12								178
FLOWER24_2X_R_SC-cell14								168
FLOWER24_2X_R_SC-cell15								128
FLOWER24_2X_R_SC-cell2								138
FLOWER24_2X_R_SC-cell9								188
FLOWER24_2x_L_SC-cell5								198
FLOWER27_2X_SC-cell11											39
FLOWER27_2X_SC-cell13										63	33
FLOWER27_2X_SC-cell14											36
FLOWER27_2X_SC-cell16										60	30
FLOWER27_2X_SC-cell17										60	33
FLOWER27_2X_SC-cell2											39
FLOWER27_2X_SC-cell6											30
FLOWER27_2X_SC-cell8											33
FLOWER27_2X_SC-cell9											39
flower29_2x_L_SC-cell-1								80				240
flower29_2x_L_SC-cell0											50	230
flower29_2x_L_SC-cell1		550	60	210	80	377	160
flower29_2x_L_SC-cell10		470	120	120	140	257	320	150	60	50	50
flower29_2x_L_SC-cell12		440	50	190	210	317	230	170	30	70	50
flower29_2x_L_SC-cell14		420	110			317	270	150			40
flower29_2x_L_SC-cell15		410	110	180			190	230			40
flower29_2x_L_SC-cell17						367	300	50	30	70	40
flower29_2x_L_SC-cell18		570	80	110	200	347	220	170	40	60	40
flower29_2x_L_SC-cell19			180	50	190	387	160	190	30	70	40
flower29_2x_L_SC-cell2		490	20	170	190	317					50
flower29_2x_L_SC-cell20		550	120	80	160	357	200	190	30	70	40
flower29_2x_L_SC-cell3		510	60	140	150	457	140
flower29_2x_L_SC-cell4					170	297					40
flower29_2x_L_SC-cell5					210	267
flower29_2x_L_SC-cell6							360				50
flower29_2x_L_SC-cell7						357	250	130	30	70	50
flower29_2x_L_SC-cell8									30	70	50
flower29_2x_L_SC-cell9						237	360	130	40	60	50
flower29_2x_R_SC-cell1									40	40	60
flower29_2x_R_SC-cell11		500
flower29_2x_R_SC-cell13				190
flower29_2x_R_SC-cell17		460	50	150
flower29_2x_R_SC-cell18		430	70	110
flower29_2x_R_SC-cell19		510	120	180
flower29_2x_R_SC-cell2							180			40	60
flower29_2x_R_SC-cell3		330	30	90
flower29_2x_R_SC-cell4									40	40	60
flower29_2x_R_SC-cell5									40	40	60
flower29_2x_R_SC-cell7									40	40	60
flower29_2x_R_SC-cell9									40	40	60
AVERAGE		506.765	96.1765	181.163	189.864	396.421	193.514	201.885	57.3333	56	42.0444	181.25	//
ST.DEV	//	97.0493	54.9388	91.4749	83.2211	190.131	74.674	108.913	29.0877	11.7631	9.74436	62.5	//
COUNTS	0	17	34	43	44	19	37	26	30	28	45	4	0
