# Supplementary material for: Live cell imaging of meiosis in Arabidopsis thaliana
Source: eLife. 2019 May 20;8:e42834. doi: 10.7554/eLife.42834 (PMC6559805; doi:10.7554/eLife.42834)
Supplement: Figure 9—source data 1. [file elife-42834-fig9-data1.xlsx]

## Sheet: resultspopulationA.csv
Figure 9 - source data 1: Landmark duration of population A, tam
sample	START	t1	t2	t3	t4	t5	t6	t7	t8	t9	t10	t11	t12
Population A_flower02-cell 10_L											90
Population A_flower02-cell 13_L						210	218	390			90
Population A_flower02-cell 14_L						180	40	458			100
Population A_flower02-cell 15_R								230			100
Population A_flower02-cell 16_R						340	78	390			110
Population A_flower02-cell 2_L					100	128	40
Population A_flower02-cell 4_L							258	140			120
Population A_flower02-cell 5_L				130							100
Population A_flower02-cell 5_R						250	108	310			100
Population A_flower02-cell 7_L						90	30	468			90
Population A_flower02-cell 7_R						140	118
Population A_flower02-cell 9_L											90
populationA_FLOWER04-cell 10_R						70
populationA_FLOWER04-cell 11_L				180	447	50	70	590		70
populationA_FLOWER04-cell 13_L					517	40	20	640		30
populationA_FLOWER04-cell 3_R		560	130			30
populationA_FLOWER04-cell 5_L				90	357
populationA_FLOWER04-cell 7_R			160	270	447	80
populationA_FLOWER04-cell 8_L			100	160
populationA_flower05-cell 1_L												120
populationA_flower05-cell 3_L					310	140	40
populationA_flower05-cell 5_L					320	120						170
populationA_flower05-cell 5_R					420					10	40	150
populationA_flower05-cell 6_L					370	90	100					160
populationA_flower05-cell 6_R
populationA_flower05-cell 7_R					410	40				10	40	150
populationA_flower05-cell 8_R					310	150	100	397			20	170
populationA_flower07-cell 10_1										120	150
populationA_flower07-cell 11_1										20	160
populationA_flower07-cell 17						170	60
populationA_flower07-cell 19							50
populationA_flower07-cell 20							60
populationA_flower08-cell 15										80	80
populationA_flower08-cell 18											80
populationA_flower08-cell 19						220	40	653			80	220
populationA_flower09-cell 0_L										10	80	140
populationA_flower09-cell 10_L						240	60
populationA_flower09-cell 11_L										70	60
populationA_flower09-cell 2_L								783			70
populationA_flower09-cell 8_L						380					70
populationA_flower13-cell 1_L							61
populationA_flower13-cell 1_R							231	300
populationA_flower13-cell 2_L											60	120
populationA_flower13-cell 3_L								400			90	110
populationA_flower13-cell 3_R							40	491
populationA_flower13-cell 5_L								300			90	130
populationA_flower13-cell 8_R							111	380			70	120
populationA_flower14-cell 0								530
populationA_flower14-cell 10				180	480
populationA_flower14-cell 15		301	120	70	510	180
populationA_flower14-cell 5				200	450			330		20	50	240
populationA_flower14-cell 8		141	190	120	380	370	80
populationA_flower15-cell 4.5							520	300			90	170
AVERAGE	//	334	140	155.556	388.533	161.217	105.542	424	//	44	84.6429	155	//
COUNT	0	3	5	9	15	23	24	20	0	10	28	14	0
ST.DEV	//	172.64	31.6228	57.5637	101.122	100.432	106.483	152.669	//	36.3868	29.4573	36.5963	//
