# Supplementary material for: Live cell imaging of meiosis in Arabidopsis thaliana
Source: eLife. 2019 May 20;8:e42834. doi: 10.7554/eLife.42834 (PMC6559805; doi:10.7554/eLife.42834)
Supplement: Figure 9—source data 2. [file elife-42834-fig9-data2.xlsx]

## Sheet: 190411_timecourse_populationB.c
Figure 9- source data 2: Landmark duration of population B, tam
sample	START	t1	t2	t3	t4	t5	t6	t7	t8	t9	t10	t11	t12
Population B_flower02-cell 11_R						110	168		130	220	100
Population B_flower02-cell 12_L									190	140	120
Population B_flower02-cell 17_R							120		230	30	80
Population B_flower02-cell 3_L					160	110	118		210	140	100
Population B_flower02-cell 6_R					240	180	148		270
populationB_FLOWER04-cell 12_L					527	40	550			130
populationB_FLOWER04-cell 1_L					467	230	340			130
populationB_FLOWER04-cell 2_R		550	320			160	630
populationB_FLOWER04-cell 4_L					437	110	120		440	130
populationB_FLOWER04-cell 6_L				80			250		270	150
populationB_FLOWER04-cell 6_R		400	80	370	427	60	400		200
populationB_FLOWER04-cell 7_L				160	417	150	190		240	130
populationB_FLOWER04-cell 9_L					367	70
populationB_flower05-cell 12_R					430	90	100
populationB_flower05-cell 4_R				180	410	60	130		120	637	50
populationB_flower07-cell 14							100
populationB_flower13-cell 4_R							140			180	80	140
populationB_flower13-cell 5_R							311			180	80	150
populationB_flower13-cell 6_L							80		150	190
populationB_flower13-cell 7_R							240			160	90
populationB_flower14-cell 6		191	180	150	110	520
populationB_flower15-cell 2										550	70
populationB_flower15-cell 5						240	140			390	80
AVERAGE	//	380.333	193.333	188	362.909	152.143	225	//	222.727	217.938	85	145	//
COUNTS	0	3	3	5	11	14	19	0	11	16	10	2	0
ST.DEV	//	147.219	98.4322	97.0361	126.943	118.151	152.419	//	84.3252	159.201	18.0278	5	//
