# Supplementary material for: Live cell imaging of meiosis in Arabidopsis thaliana
Source: eLife journal article supplement (doi:10.7554/elife.42834), 2019-05-20

**Figure 2- figure supplement 1: Rescue of *rec8*<sup>-/-</sup> phenotype after introgression of  $\text{PRO}_{\text{REC8}}\text{:REC8:GFP}$  (REC8:GFP) and wildtype phenotype of the line KINGBIRD**

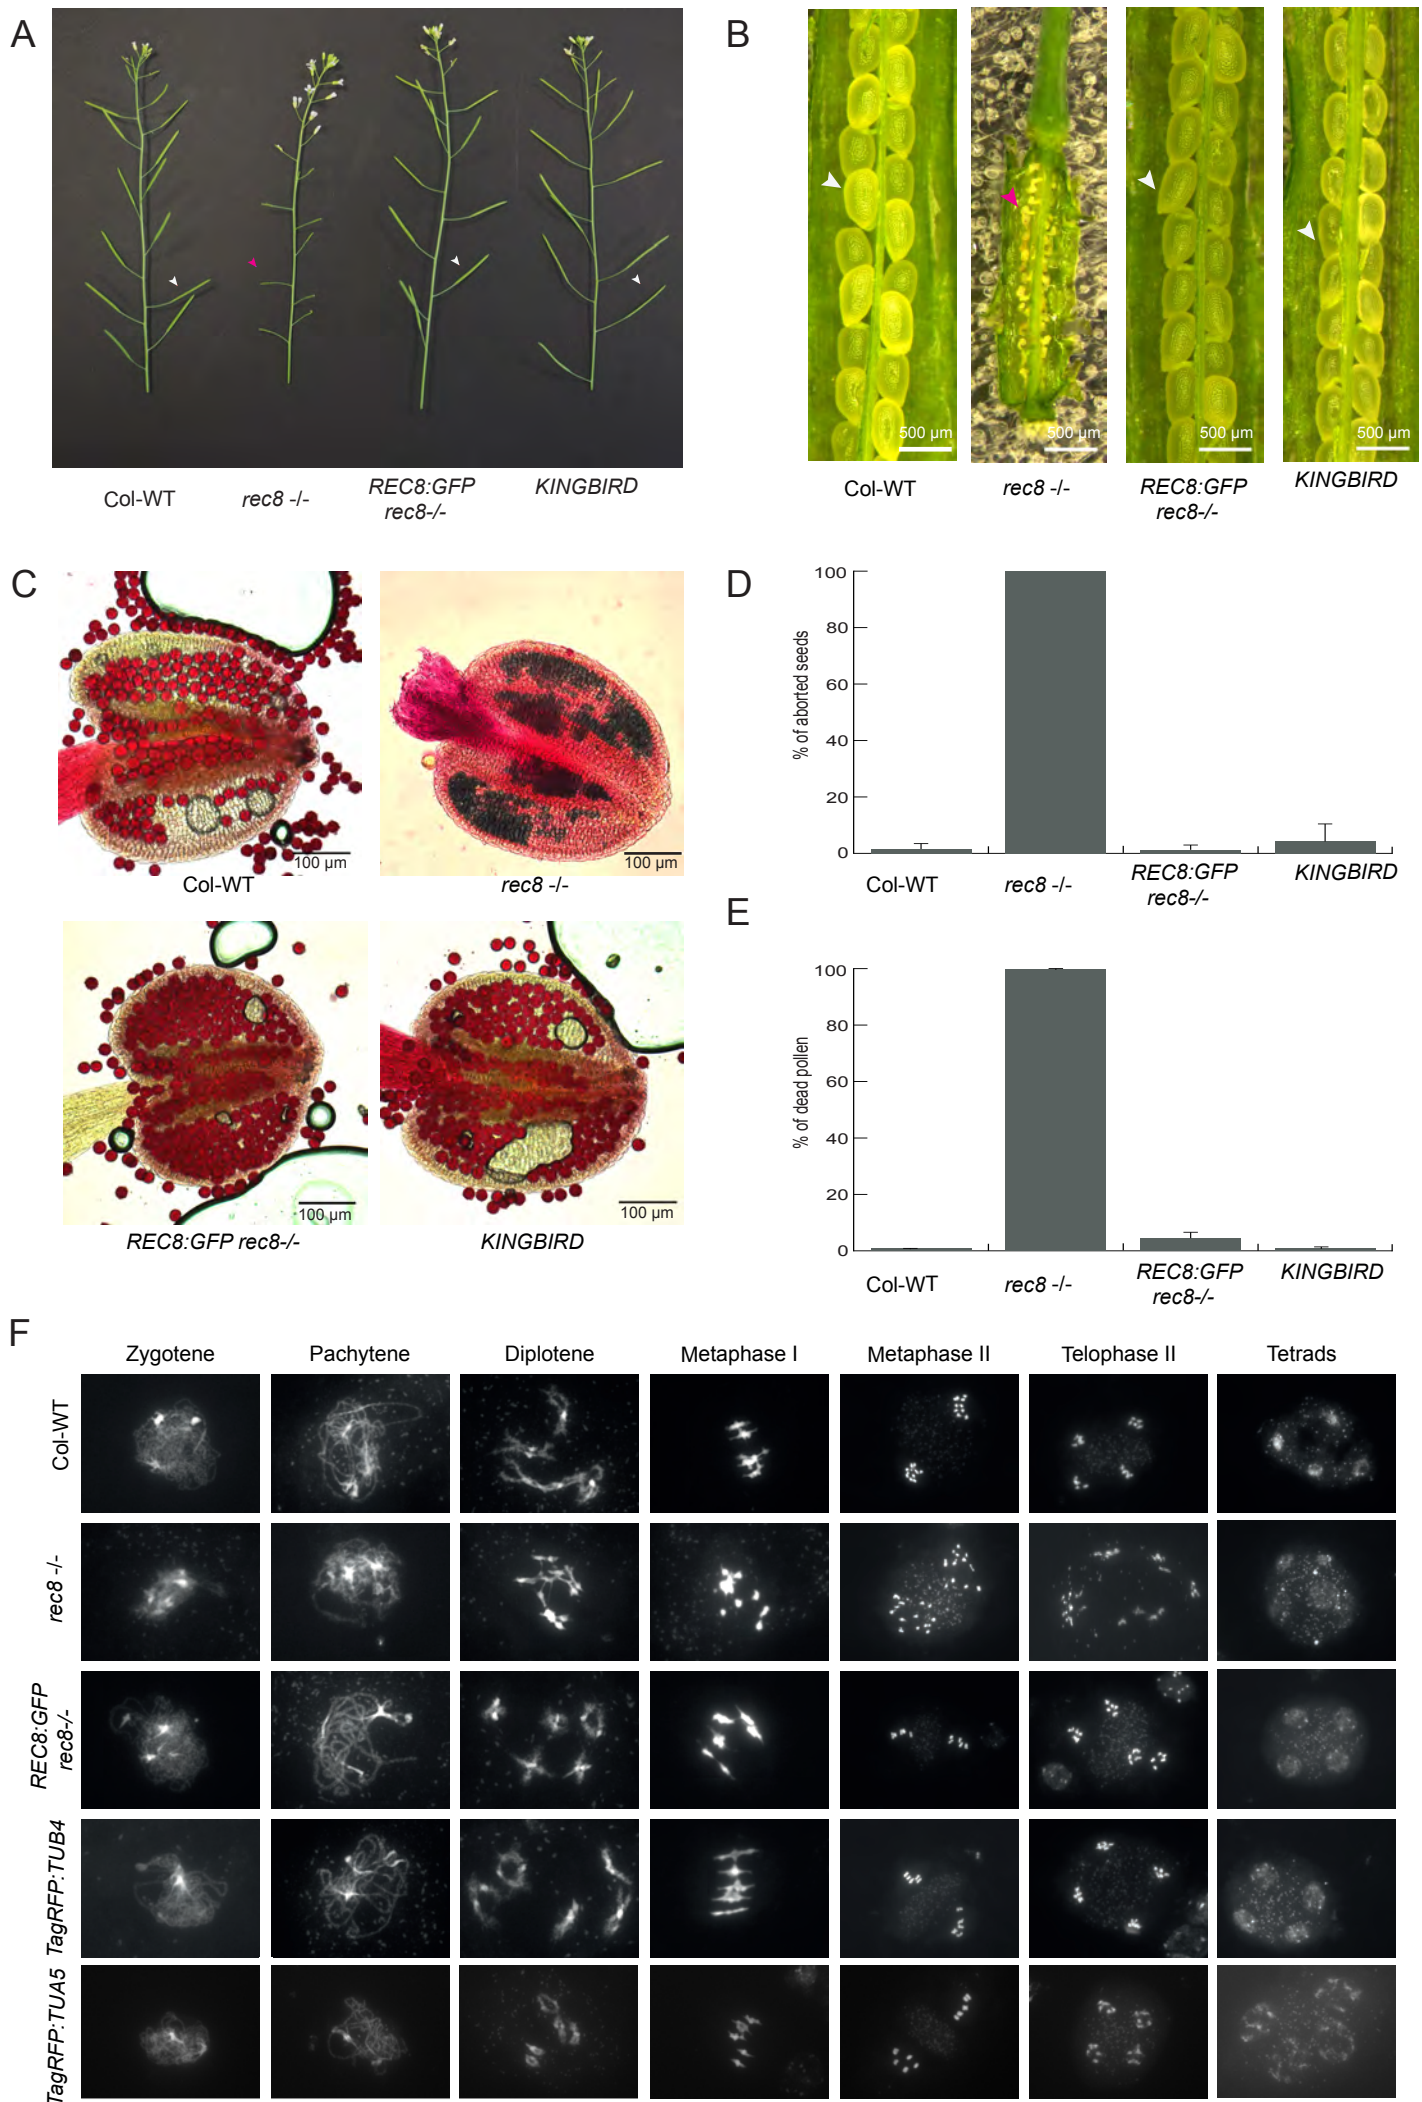

Supplement: supp [file elife-42834-supp-v1.zip]
