# Supplementary material for: Live cell imaging of meiosis in Arabidopsis thaliana
Source: eLife journal article supplement (doi:10.7554/elife.42834), 2019-05-20
Supplement: supp [file elife_poa_e42834_Figure_4_source_data_3.xlsx]

## Sheet: Sheet1
STATES OF CELL FEATURES
Cell shape	Mt Array	Nucleus Position	Nucleolus Position	Rec8/ Chromatin	Count	Frequency in %	Neighbor. score	Landmark
1	1	1	1	1	58	0.952068	0.281811	START
1	1	1	1	2	2	0.0328299	-0.79512
1	1	1	2	2	80	1.3132	2.08853	t1
1	1	1	2	3	5	0.0820749	-0.451379
1	1	1	3	2	4	0.0656599	-0.556708
1	1	1	3	3	17	0.279054	0.0235559
1	2	1	2	2	8	0.13132	-0.218112
1	2	1	2	3	1	0.016415	-0.627792
1	2	1	3	2	3	0.0492449	-0.538702
1	2	1	3	3	18	0.295469	1.11236	t2
1	2	2	3	3	3	0.0492449	-0.450293
1	3	1	2	2	1	0.016415	-0.659059
1	3	1	3	3	24	0.393959	-0.102842
1	3	2	3	3	18	0.295469	-0.401647
2	2	2	3	3	1	0.016415	-0.488305
2	3	1	3	3	8	0.13132	-0.545787
2	3	2	2	3	9	0.147735	-0.489551
2	3	2	3	3	199	3.26658	1.37267	t3
2	3	2	3	4	14	0.22981	-0.547399
2	4	2	2	3	5	0.0820749	-0.955648
2	4	2	2	4	4	0.0656599	-0.604665
2	4	2	3	3	272	4.46487	0.695298
2	4	2	3	4	177	2.90545	0.0920148
2	4	2	3	5	12	0.19698	-0.611546
3	4	2	3	3	98	1.60867	-0.368536
3	4	2	3	4	662	10.8667	2.7888	t4
3	4	2	3	5	432	7.09127	1.58131	t5
3	4	2	4	5	11	0.180565	-0.564031
3	4	3	3	4	1	0.016415	-0.654223
3	4	3	3	5	17	0.279054	-0.565824
3	5	2	3	4	17	0.279054	-0.597823
3	5	2	3	5	75	1.23112	-0.146078
3	5	2	3	6	1	0.016415	-0.670955
3	5	2	4	5	17	0.279054	-0.501837
STATES OF CELL FEATURES
Cell shape	Mt Array	Nucleus Position	Nucleolus Position	Rec8/ Chromatin	Count	Frequency in %	Neighbor. score	Landmark
3	5	2	4	6	20	0.328299	-0.529938
3	5	3	3	4	28	0.459619	-0.451524
3	5	3	3	5	211	3.46356	1.37511	t6
3	5	3	3	6	45	0.738674	-0.347907
3	5	3	4	5	53	0.869993	-0.244404
3	5	3	4	6	79	1.29678	0.0781373
3	6	2	3	5	46	0.755089	-0.167681
3	6	2	3	6	17	0.279054	-0.442449
3	6	2	4	5	33	0.541694	-0.167416
3	6	2	4	6	254	4.1694	3.3619	t7
3	6	3	3	5	43	0.705844	-0.195836
3	6	3	3	6	32	0.525279	-0.376435
3	6	3	4	6	74	1.21471	0.351699
3	6	4	4	6	1	0.016415	-1.22848
3	7	2	4	6	5	0.0820749	-0.439253
3	7	3	3	6	5	0.0820749	-0.737471
3	7	3	4	5	1	0.016415	-0.737701
3	7	3	4	6	9	0.147735	-0.368541
3	8	2	4	6	1	0.016415	-1.13555
3	8	3	4	5	2	0.0328299	-0.408638
3	8	3	4	6	3	0.0492449	-0.382815
3	8	4	4	6	1	0.016415	-0.660597
3	8	4	4	7	3	0.0492449	-0.443707
3	9	4	4	5	2	0.0328299	-0.19868
3	9	4	4	6	4	0.0656599	-0.454956
3	9	4	4	7	24	0.393959	0.745054
3	9	4	4	8	1	0.016415	-0.56587
3	10	4	4	8	6	0.0984898	0.106947
3	10	5	4	8	1	0.016415	-0.717261
3	11	4	4	8	1	0.016415	-0.367527
3	11	5	4	8	12	0.19698	-0.41801
3	12	5	4	8	264	4.33355	1.97239	t11
4	4	3	3	4	2	0.0328299	-0.513208
4	4	3	3	5	5	0.0820749	-0.581593
STATES OF CELL FEATURES
Cell shape	Mt Array	Nucleus Position	Nucleolus Position	Rec8/ Chromatin	Count	Frequency in %	Neighbor. score	Landmark
4	5	2	3	5	1	0.016415	-0.607267
4	5	2	4	6	1	0.016415	-0.652858
4	5	3	3	4	7	0.114905	-0.568052
4	5	3	3	5	258	4.23506	2.34381	t8
4	5	3	3	6	17	0.279054	-0.622819
4	5	3	4	5	34	0.558109	-0.382016
4	5	3	4	6	237	3.89035	2.08854	t9
4	6	2	4	5	1	0.016415	-0.644267
4	6	2	4	6	12	0.19698	-0.508157
4	6	3	3	5	79	1.29678	0.322611
4	6	3	3	6	8	0.13132	-0.661742
4	6	3	4	5	3	0.0492449	-0.717897
4	6	3	4	6	82	1.34603	0.401886
4	7	3	3	5	9	0.147735	-0.564933
4	7	3	3	6	45	0.738674	0.602321
4	7	3	4	6	23	0.377544	0.146507
4	7	3	4	7	1	0.016415	-0.768233
4	8	3	4	6	7	0.114905	-0.161028
4	8	4	4	7	1	0.016415	-0.573734
4	9	4	4	7	54	0.886408	2.25827	t10
4	9	4	4	8	3	0.0492449	-0.451042
4	10	4	4	8	1	0.016415	-0.420189
4	10	5	4	8	2	0.0328299	-0.564574
4	11	4	4	8	1	0.016415	-0.384566
4	11	5	4	8	9	0.147735	-0.360136
4	12	4	4	8	1	0.016415	-0.540559
4	12	5	3	8	6	0.0984898	-0.586115
4	12	5	4	8	184	3.02035	0.593699
4	13	5	4	8	18	0.295469	-0.641767
5	12	5	4	8	4	0.0656599	-0.660456
5	13	5	4	8	438	7.18976	0.783954
5	14	5	4	8	55	0.902823	-0.795331
6	13	5	4	8	208	3.41431	-0.26015
6	14	5	4	8	720	11.8188	1.2592	t12/END
