# Supplementary figures and images for: Live cell imaging of meiosis in Arabidopsis thaliana
Source: eLife journal article supplement (doi:10.7554/elife.42834), 2019-05-20

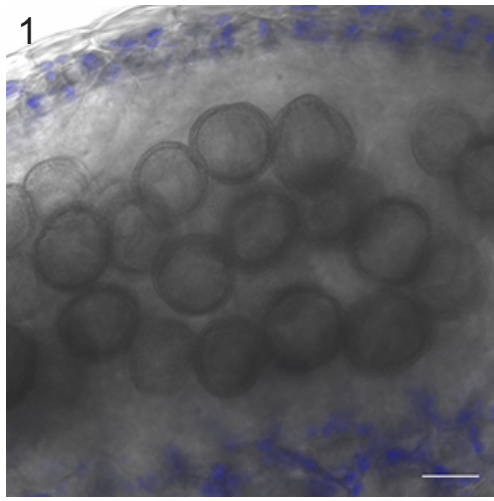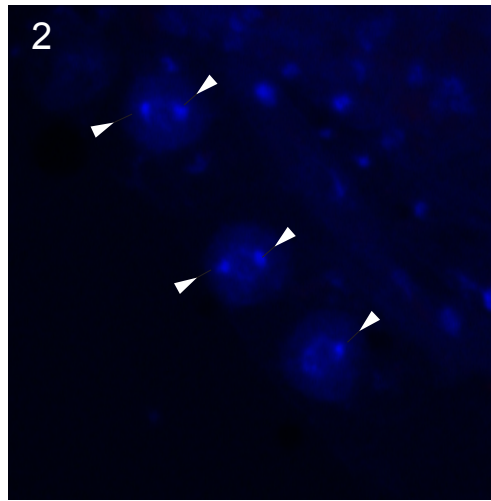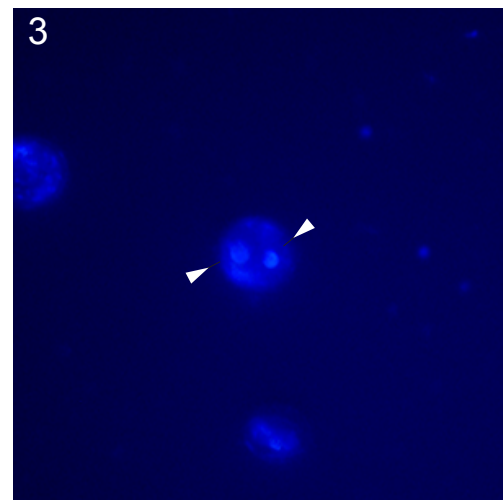

**Figure1- figure supplement1: Pollen undergoes a further cell division after imaging**

Supplement: supp [file elife-42834-supp-v1.zip]
